# Supplementary material for: Polymorphism in a two-dimensional copper(i) metal–organic framework with the ligand bis(4-pyridylthio)methane
Source: Royal Society of Chemistry journal article supplement (doi:10.1039/d1ce00461a), 2021-01-01
Supplement: d1ce00461a1.pdf [file d1ce00461a1.pdf]

# Polymorphism in a Two-Dimensional Copper(I) Metal-Organic Framework with the ligand bis(4- pyridylthio)methane

Olaya Gómez-Paz<sup>1</sup>, Rosa Carballo<sup>1,\*</sup>, Ana Belén Lago<sup>2,\*</sup>, Ezequiel M. Vázquez-López<sup>1</sup>

<sup>1</sup> Departamento de Química Inorgánica, Instituto de Investigación Sanitaria Galicia Sur (IISGS)- Universidade de Vigo, 36310 Vigo, Galicia, Spain; [rcrial@uvigo.es](mailto:rcrial@uvigo.es)

<sup>2</sup> Departamento de Química, Facultad de Ciencias, Sección Química Inorgánica, Universidad de la Laguna, 38206 La Laguna, Spain; [alagobla@ull.edu.es](mailto:alagobla@ull.edu.es)

\* Correspondence: [rcrial@uvigo.es](mailto:rcrial@uvigo.es) (R.C.) and [alagobla@ull.edu.es](mailto:alagobla@ull.edu.es) (A.B.L.)

## Supplementary material

| Contents:                                                                    | Page |
|------------------------------------------------------------------------------|------|
| 1. Characterization                                                          | 2    |
| 2. Study of structural stability in water and tetrahydrofuran (THF) solvents | 6    |
| 3. Hirshfeld surface analysis                                                | 7    |
| 4. Thermal analysis                                                          | 8    |

## 1. Characterization

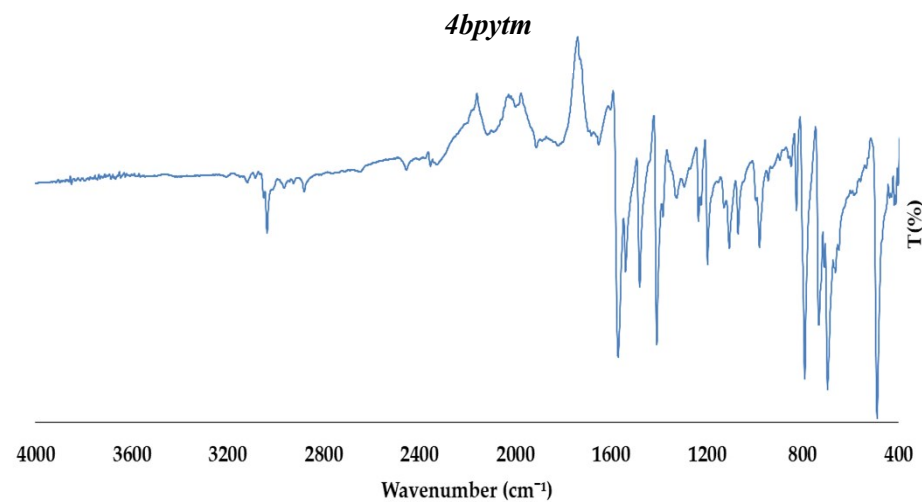

*P2<sub>1</sub>/n (1)*

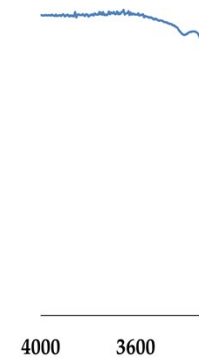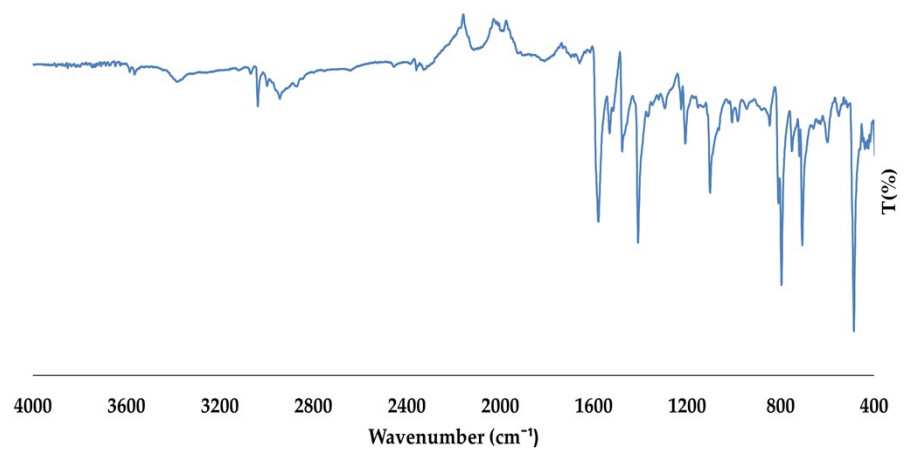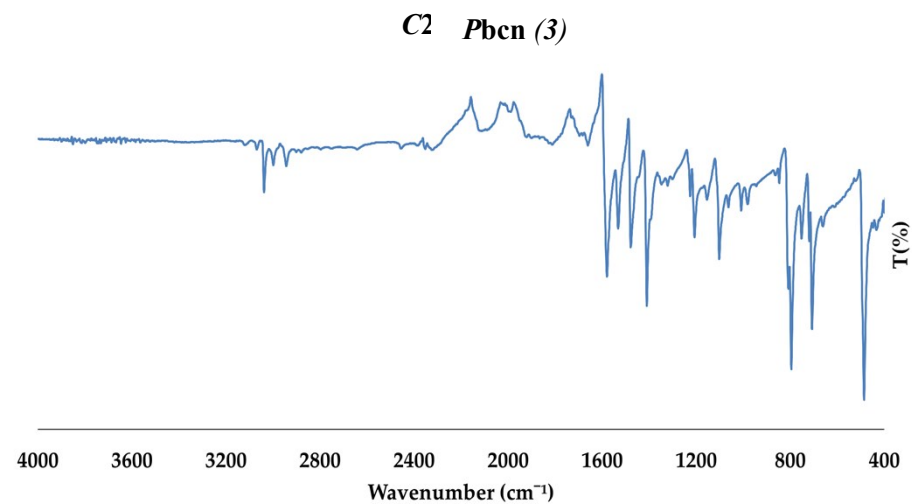

Figure S1. Infrared spectra (IR) of **4bpytm**, **1**, **2** and **3** in the range 4000-400 cm<sup>-1</sup>

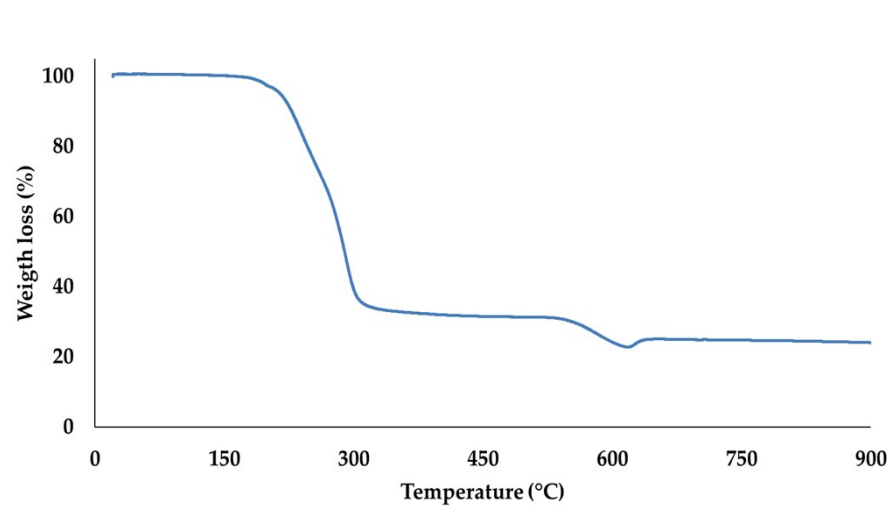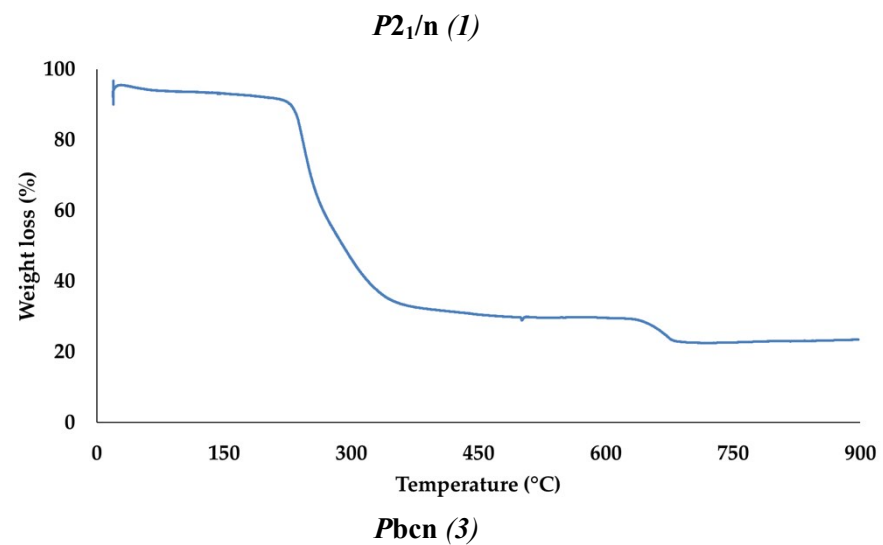

**Figure S2.** Thermogravimetric analysis (TGA, above) and differential scanning calorimetry (DSC, below)

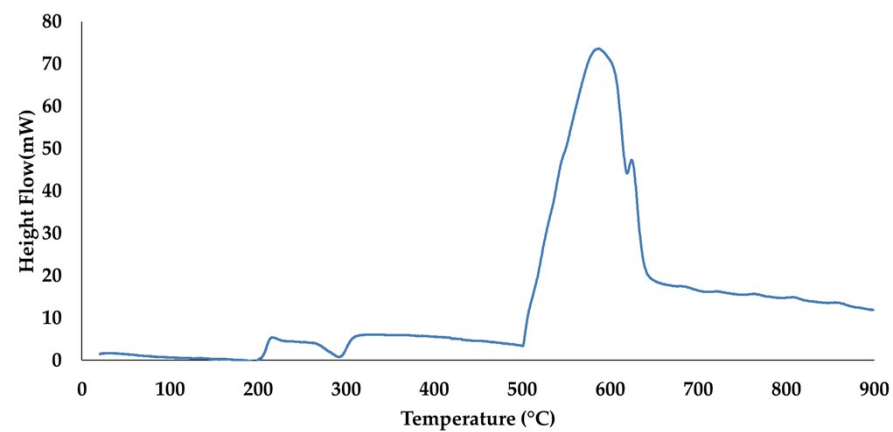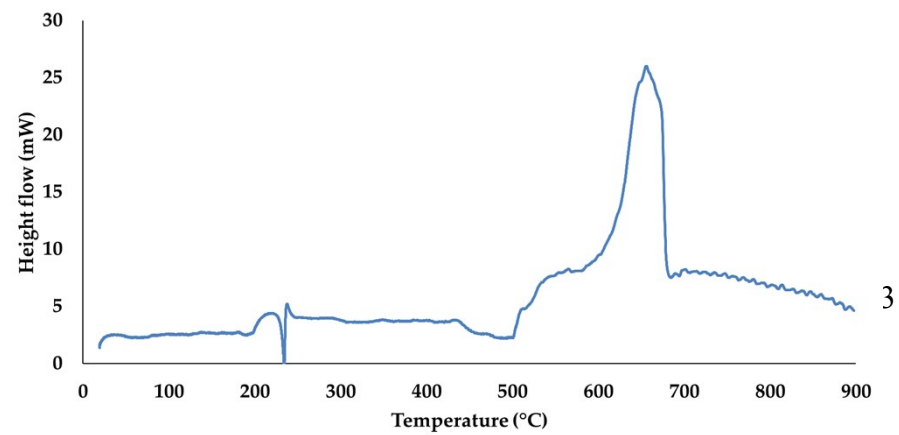

Powder X-ray diffractograms of different as-synthesized compound compared with the different simulated XRDP from the different polymorphs structures and Cu(II) phase.

a) **Phase composition:**  ${}^2_{\infty}\text{CuCl}_2(4\text{bpytm})_2 + \text{P2}_1/\text{n}$  (**1**)

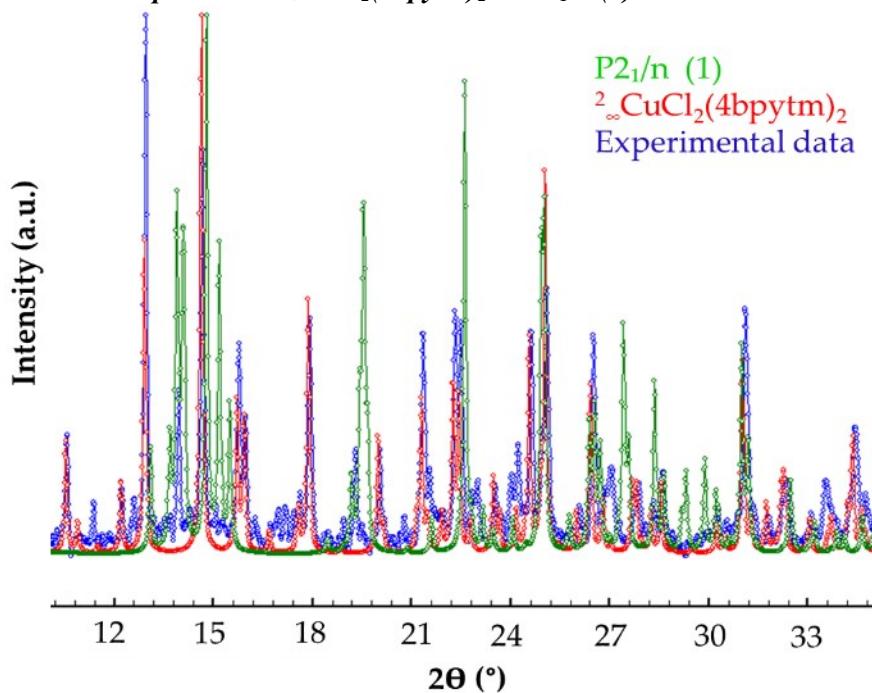

**Figure S3.** Experimental powder X-ray diffractogram (blue) with simulated XRDP from crystal structures of **1** (green) and Cu(II) phase  $[\text{CuCl}_2(4\text{bpytm})_2]$  (red)

b) **Phase composition:**  ${}^2_{\infty}\text{CuCl}_2(4\text{bpytm})_2 + \text{Pbcn}$  (**3**)

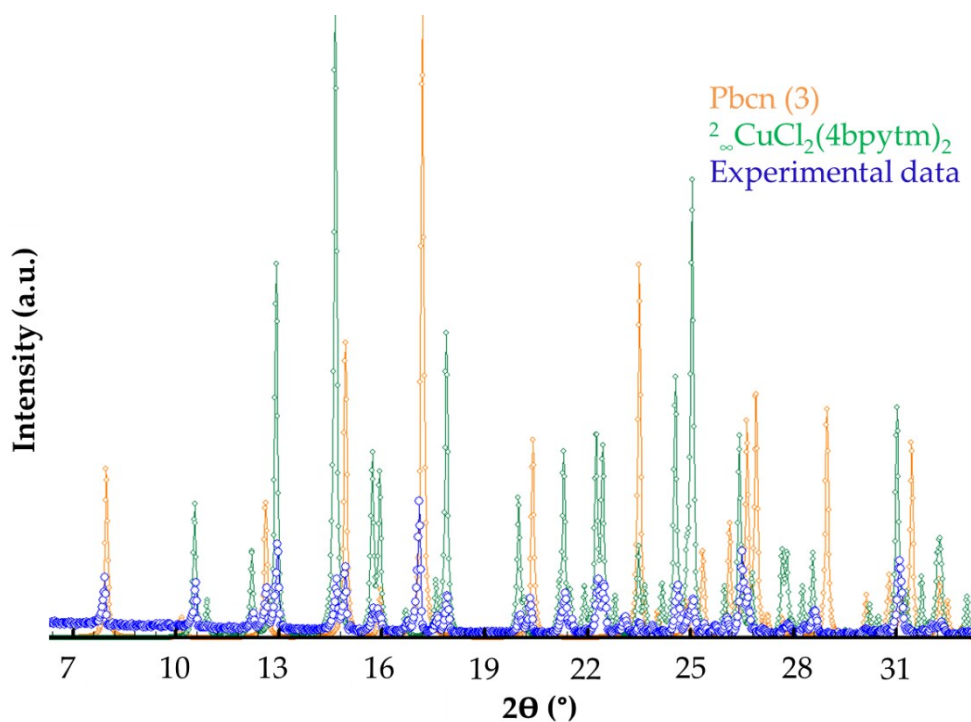

**Figure S4.** Experimental powder X-ray diffractogram (blue) with simulated XRDP from crystal structures of **3** (red) and Cu(II) phase  $[\text{CuCl}_2(4\text{bpytm})_2]$  (green)

c) *Phase composition:  $P2_1/n$  (1) +  $Pbcn$  (3)*

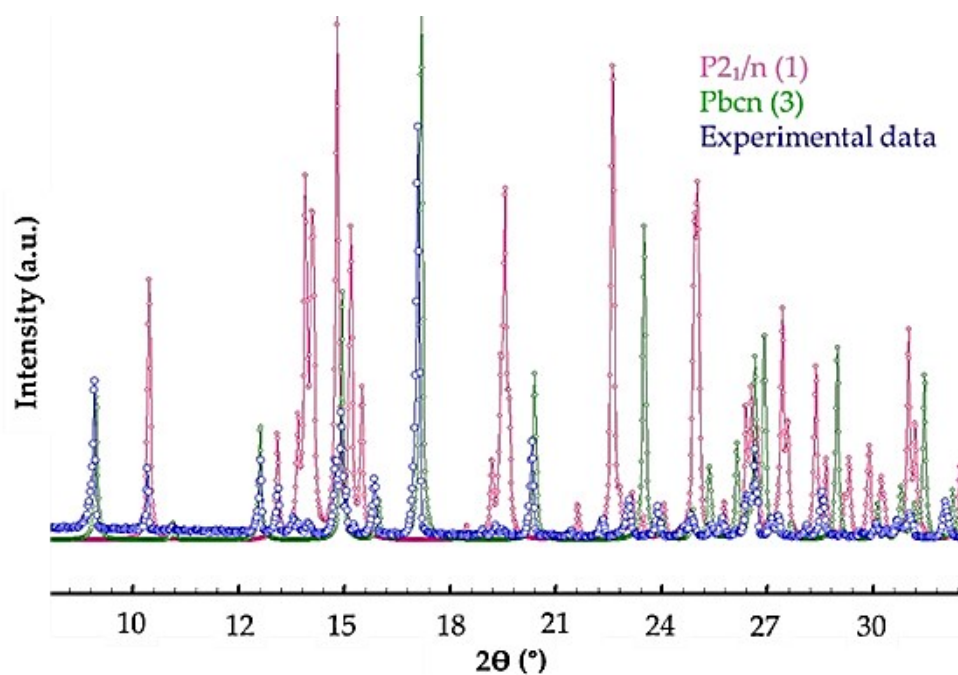

Figure S5. Experimental powder X-ray diffractogram (blue) with simulated XRDP from crystal structures of **1** (red) and **3** (green)

d) *Phase composition:  $Pbcn$  (3)*

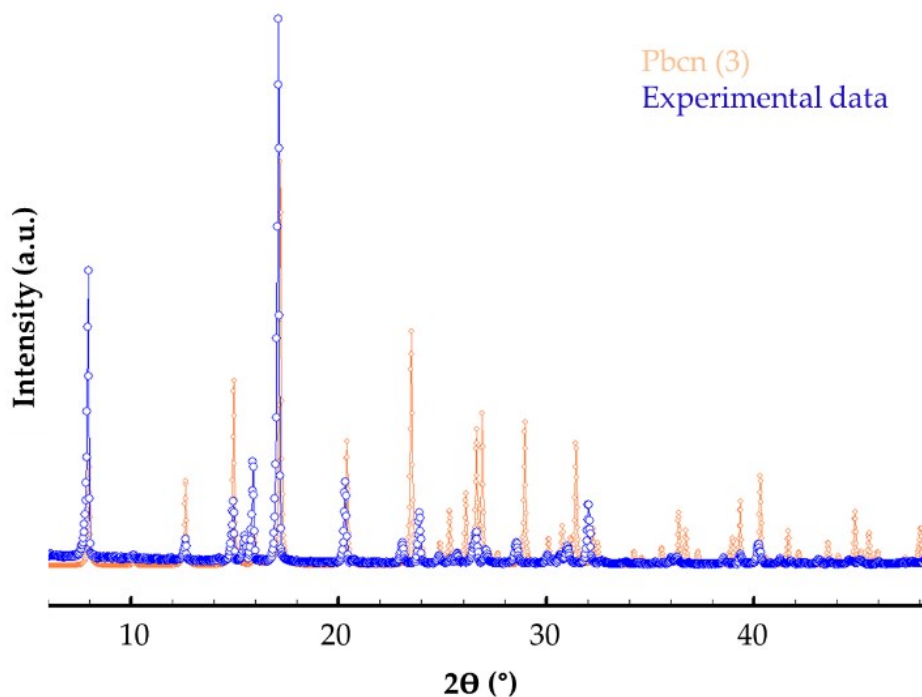

Figure S6. Experimental powder X-ray diffractogram (blue) and simulated XRDP from crystal structures of **3** (orange)

## 1. Study of structural stability in water and THF solvents

A) A suspension of **3** was soaked in **water** and **tetrahydrofuran** for 7 days at room temperature. The resulting solid was characterized by XRDP. No structural transformation was detected.

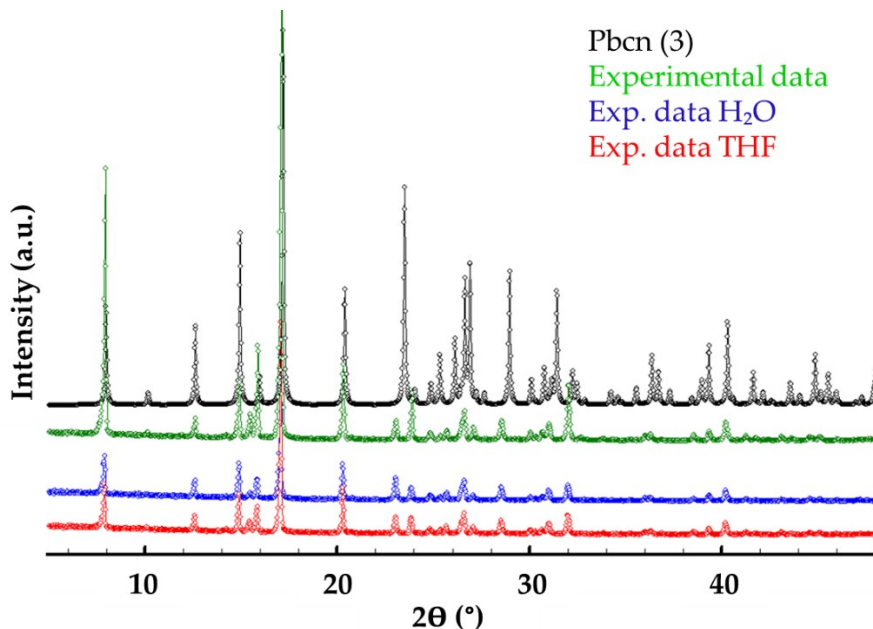

**Figure S7.** Calculated from single crystal data of **3** (black) and experimental powder X-ray diffractograms for **3** before (green) and after the treatment to study the stability in water (blue) and THF (red) solvents

B) A suspension of **multi-component crystalline solid** (phase 1 and 3) was soaked in **water** and **tetrahydrofuran** for 7 days at room temperature. The resulting solid was characterized by X-ray powder diffraction (XRPD). No structural transformation was confirmed by X-ray powder diffraction.

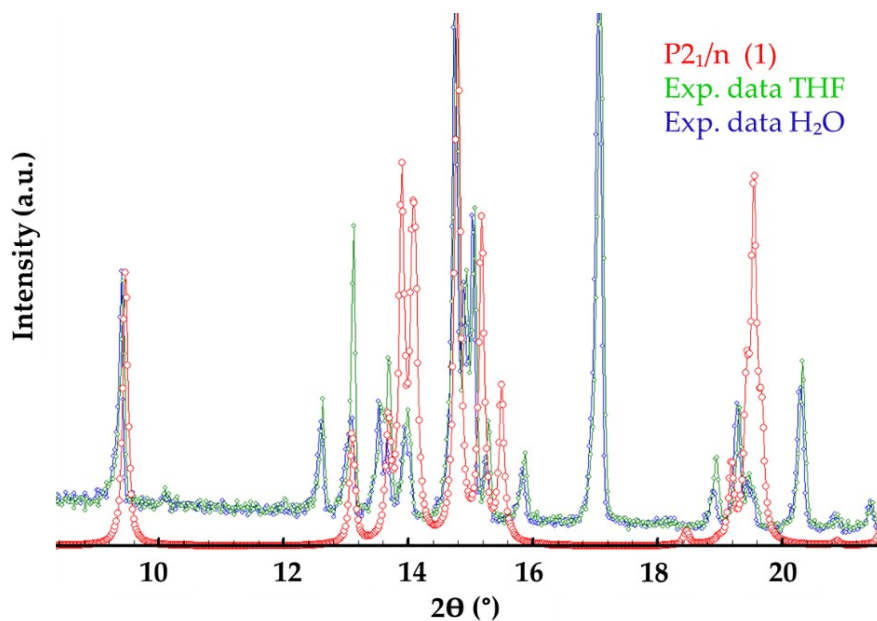

**Figure S8.** Calculated from single crystal data of **1** (red) and experimental powder X-ray diffractograms for **multi-component crystalline solid** after the treatment in water (blue) and THF (green) solvents

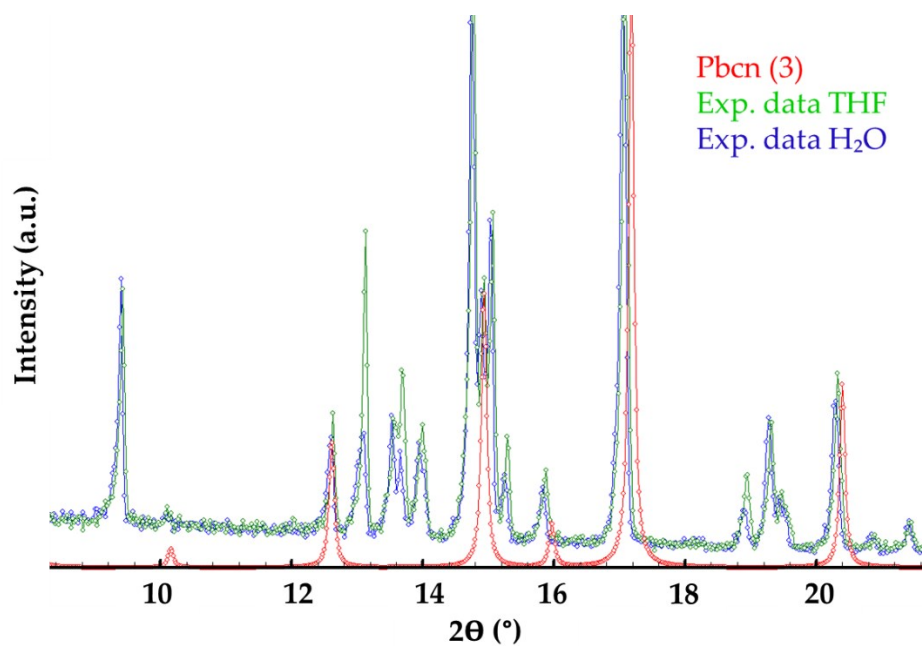

**Figure S9.** Calculated from single crystal data of **3** (red) and experimental powder X-ray diffractograms for **multi-component crystalline solid** after the treatment in water (blue) and THF (green) solvents.

## 2. Hirshfeld surface analysis

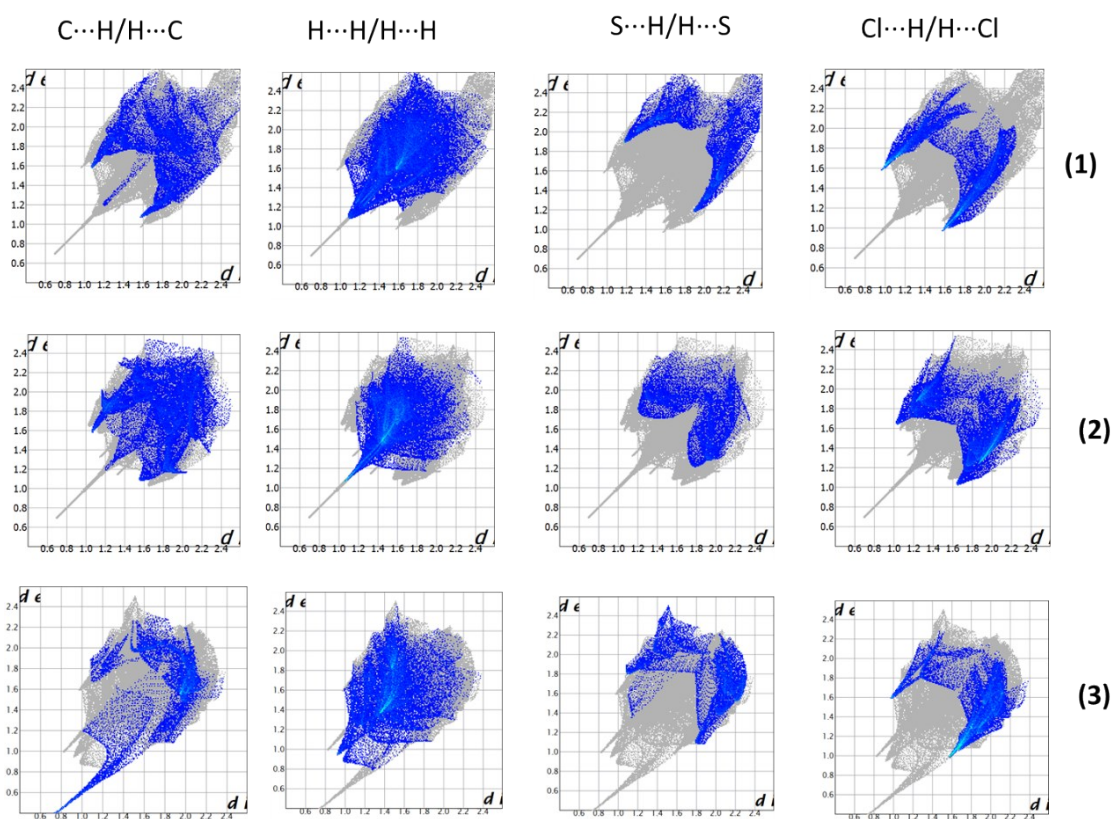

**Figure S10.** Fingerprint plots for C...H/H...C, H...H, Cl...H/H...Cl, and H...S/S...H contacts. The outline of the full fingerprint is shown in gray.

### 3. Thermal analysis

*Mixed phases (1+3):  $P2_1/n$  (1) +  $Pbcn$  (3)*

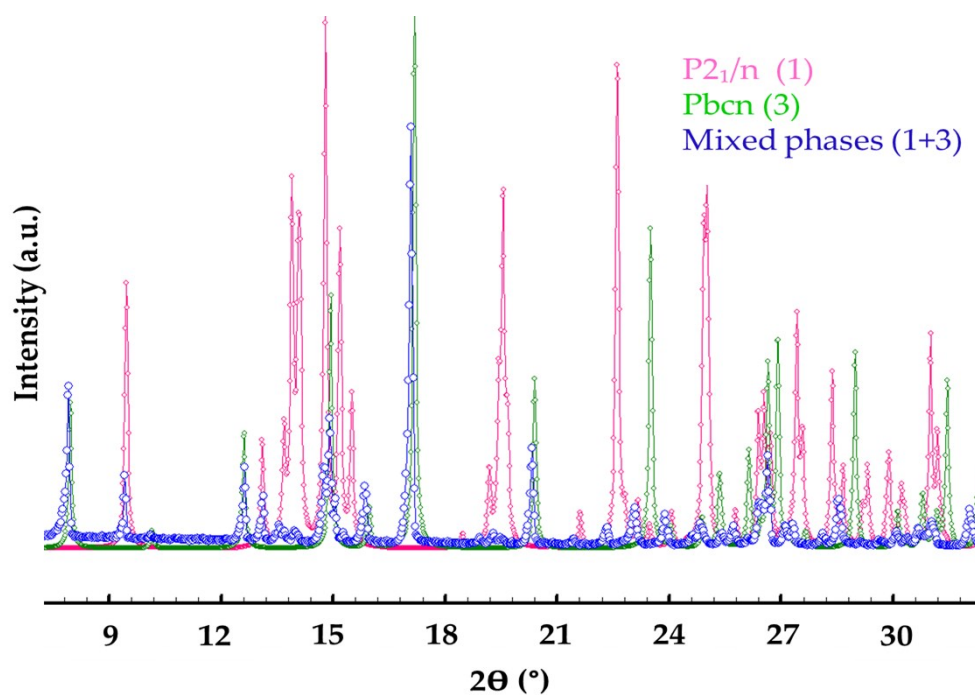

**Figure S11.** Experimental powder X-ray diffractograms for **mixed phases (1+3)** (blue) with simulated XRD from crystal structures of **1** (red) and **3** (green)

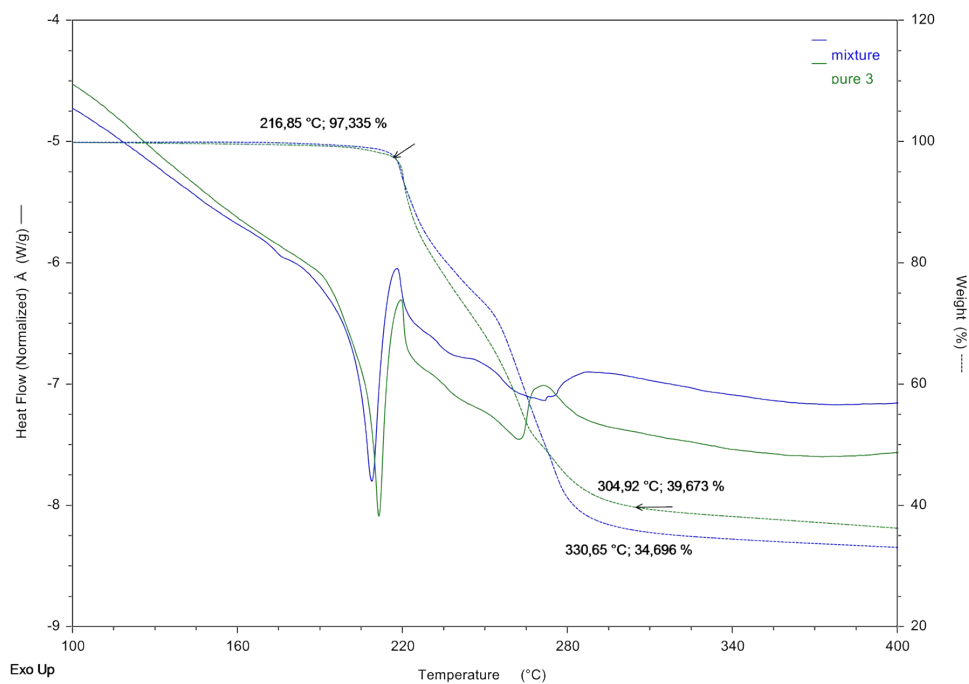

**Figure S12.** TGA and DTG analysis of **mixed phases (1+3)** (blue) and **3** (green)

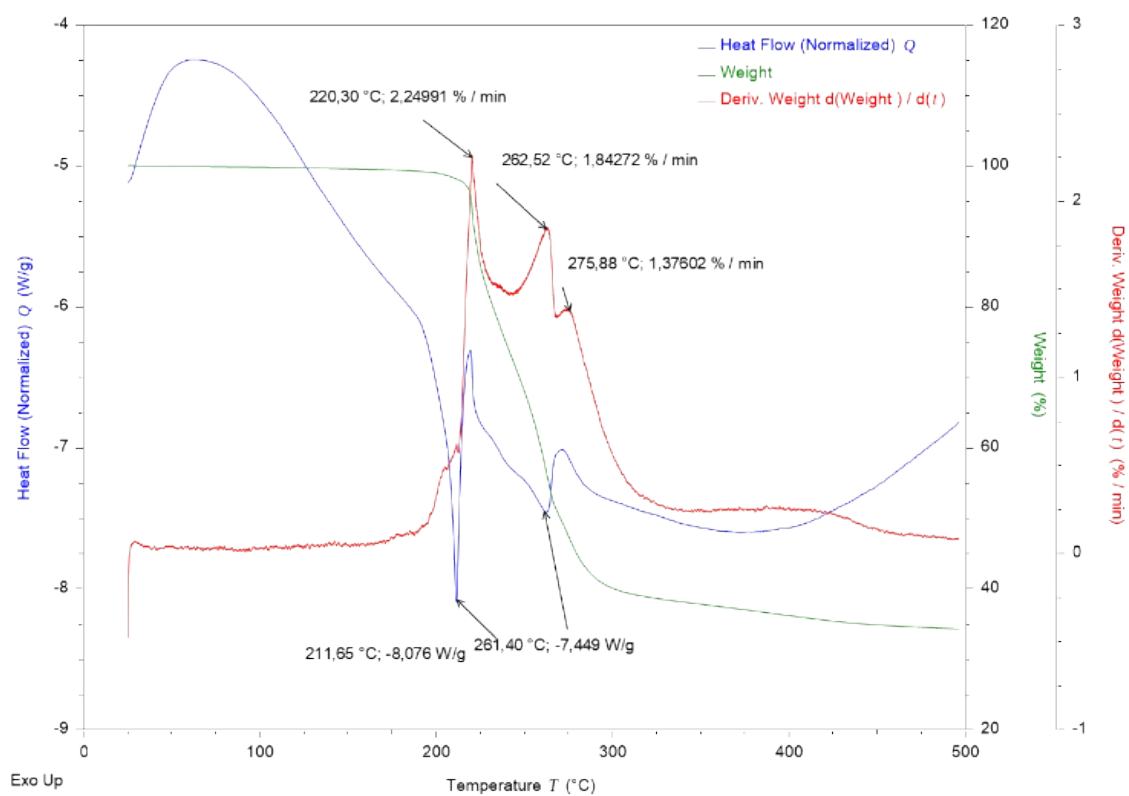

Figure S13. TGA (green), DTG (red) and DTA (blue) analysis of pure **phase 3**

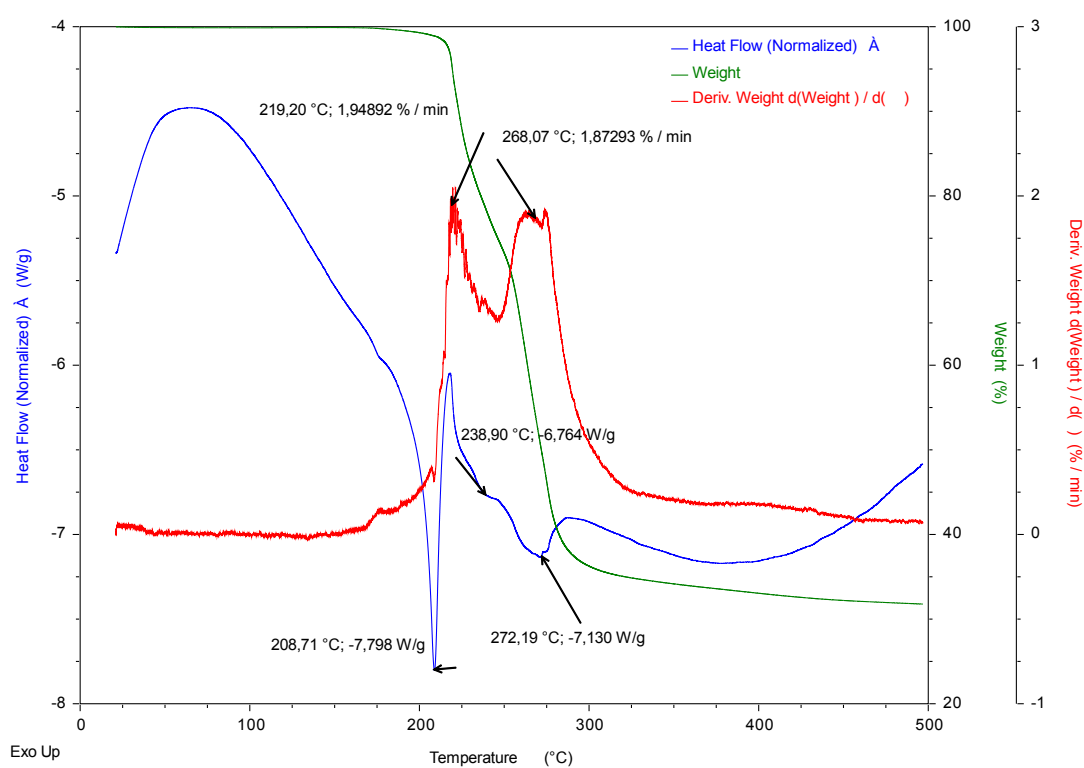

Figure S14. TGA (green), DTG (red) and DTA (blue) analysis of **mixed phases (1+3)**

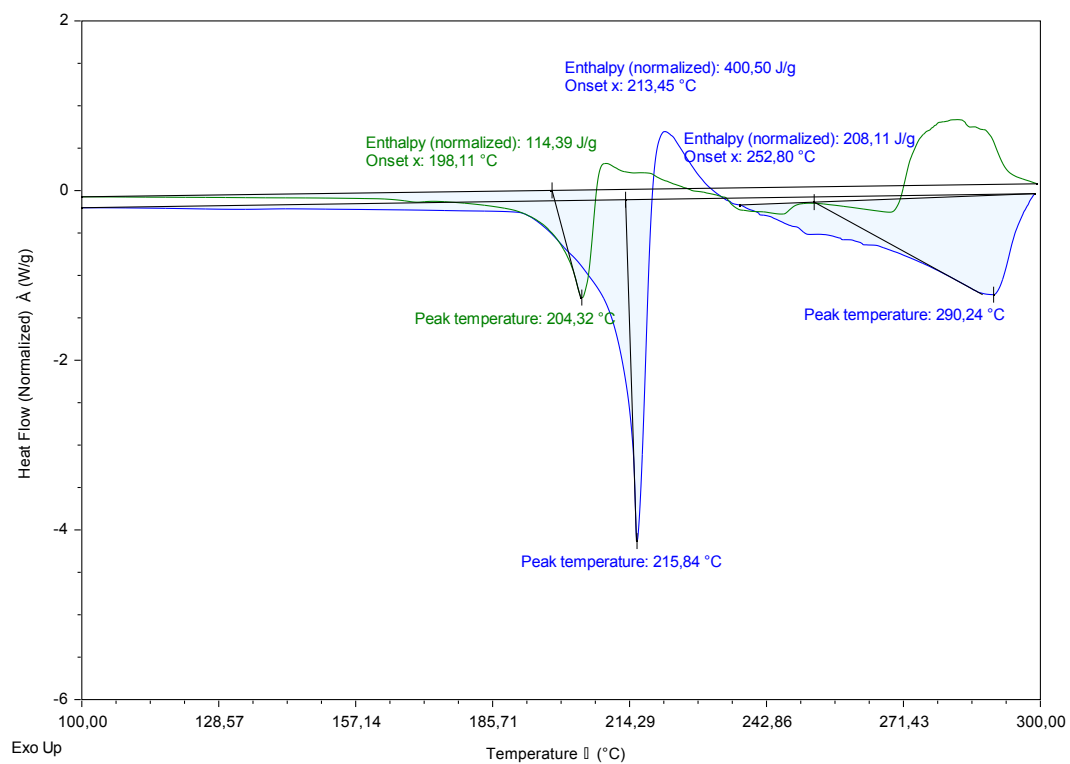

**Figure S15.** DSC analysis of **mixed phases (1+3)** (green) and **3** (blue) from 100°C to 300°C

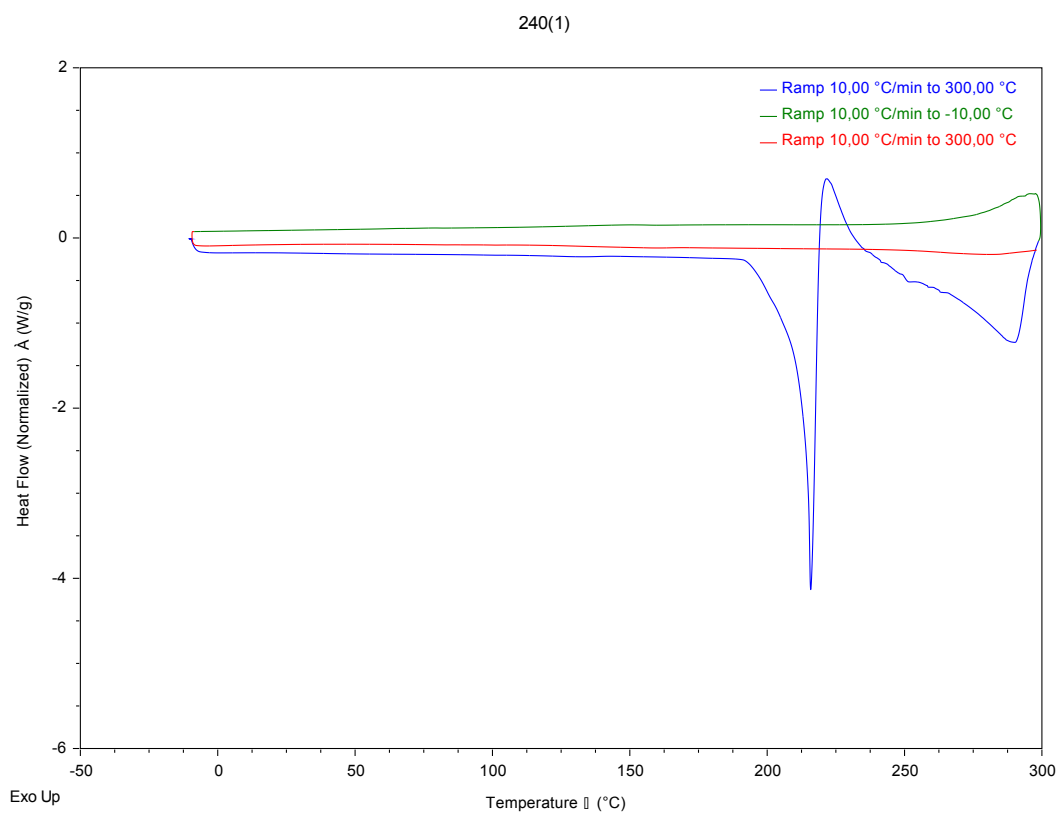

**Figure S16.** DSC heating-cooling process from -10°C to 300°C of **3 pure**

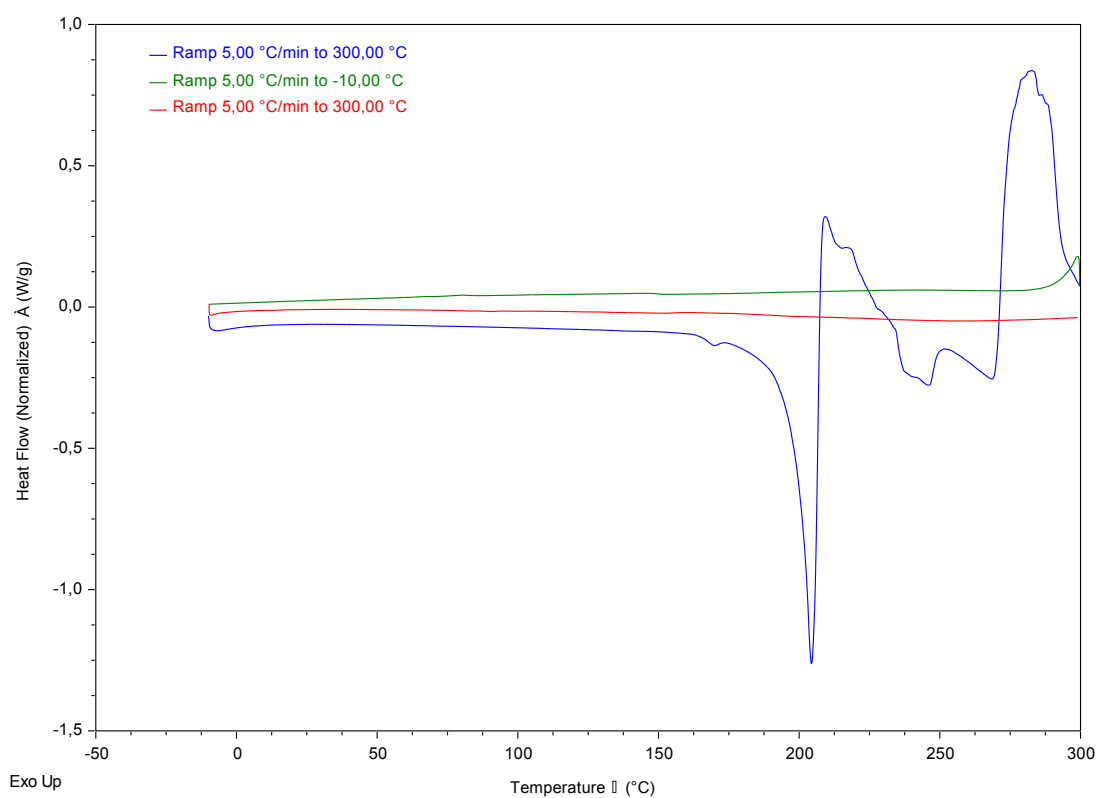

Figure S17. DSC heating-cooling process from -10°C to 300°C of **mixed phases (1+3)**

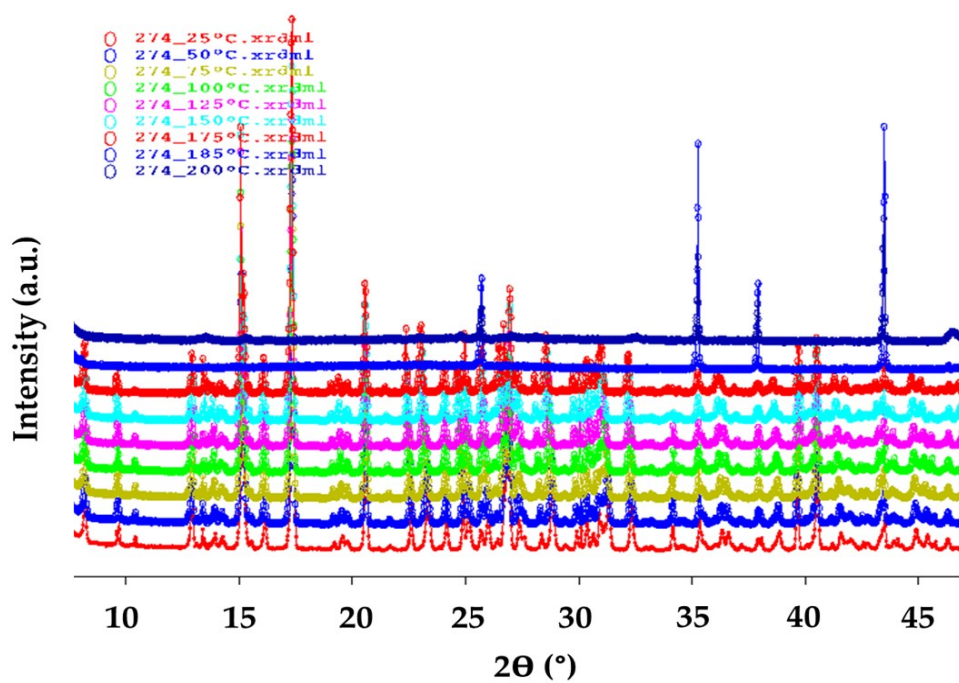

Figure S18. Variable-temperature X-ray powder diffraction of **mixed phases (1+3)** (blue) with the collapsed of the structure before 185°C

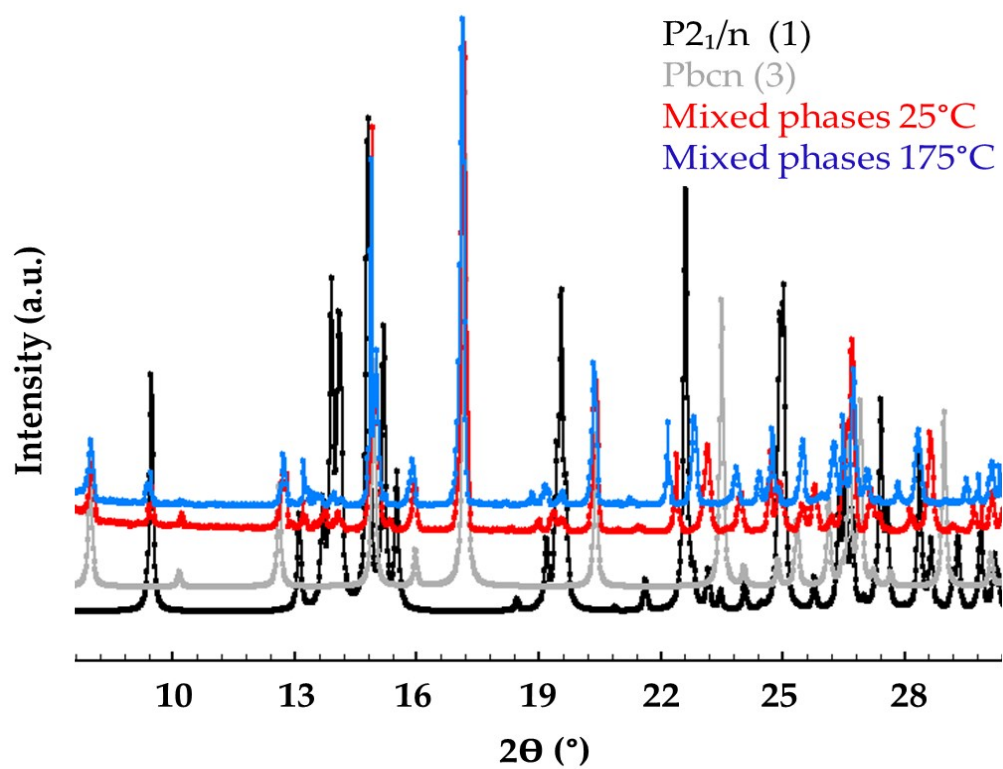

**Figure S19.** Experimental powder X-ray diffractograms for **mixed phases (1+3)** at 25 (red) and 175°C (blue) with simulated XRD from crystal structures of **1** (black) and **3** (grey)

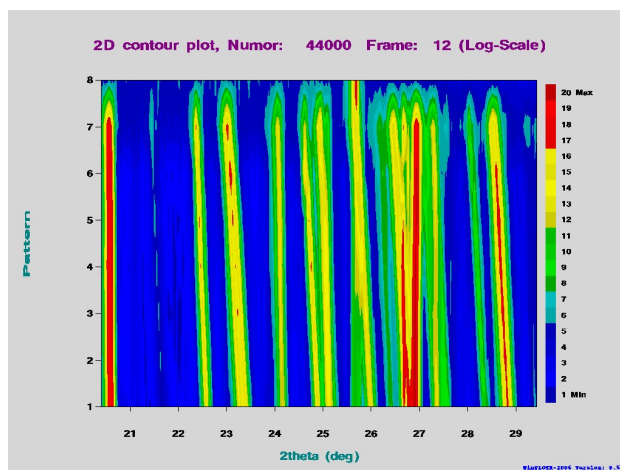

A)

B)

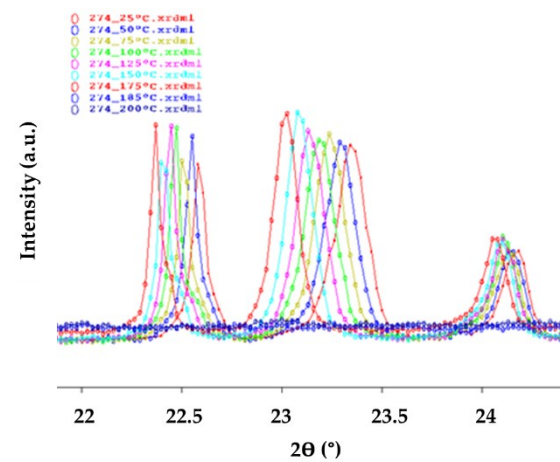

C)

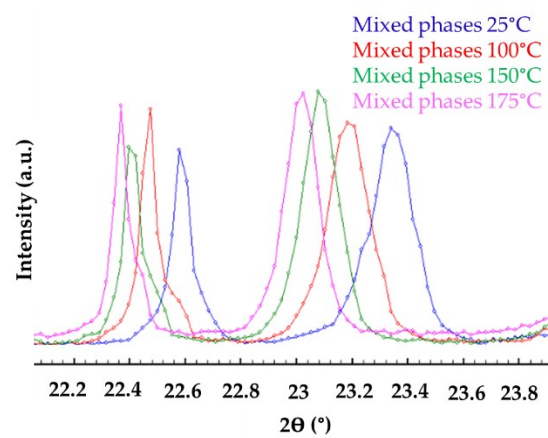

D)

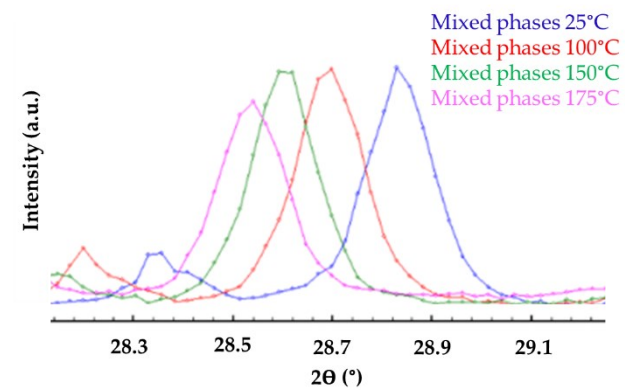

**Figure S20.** (a) Two-dimensional intensity contours extracted from the XRTD patterns collected as a function of the temperature in the range 25–200°C. Peak shifting observed between 22–25° (b and c) and ~28.7 (d) towards lower  $2\theta$  degrees as the temperature increases in the XRTD pattern

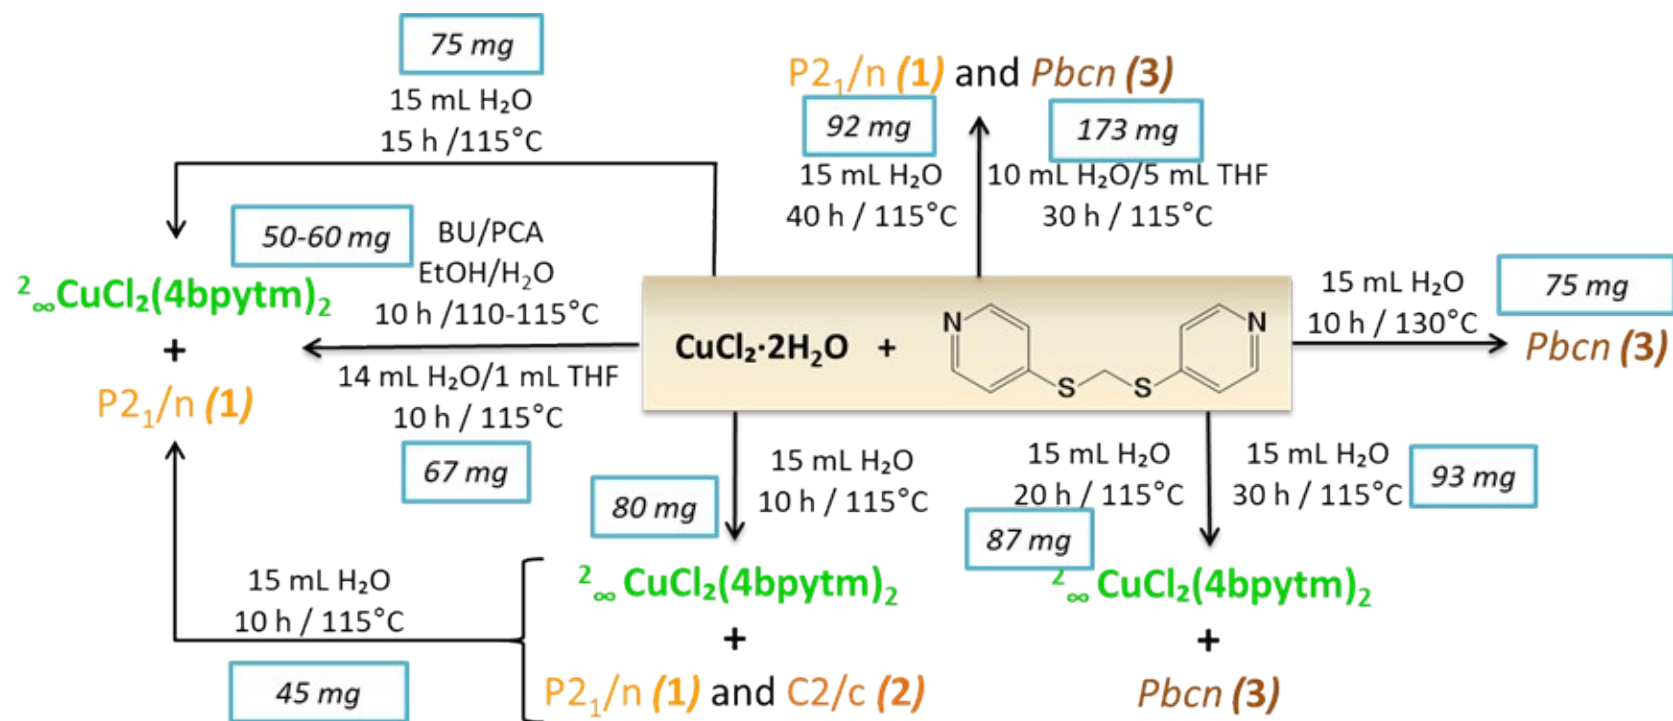

**Figure S21.** Schematic representation of the reaction conditions for the formation of the compounds with the total amount of sample obtained in each synthetic procedure.
